# Supplementary material
Source: HighWire-hosted journal article supplement (https://adc.bmj.com/content/archdischild-2017-313777)
Supplement: inline-supplementary-material-1 [file inline-supplementary-material-1.docx]

**Appendix 1**: Diagnostic codes for additional anomalies and syndromes used to identify patients with a “non-isolated” cleft.

Patients were defined as having a “non-isolated” oral cleft if there was a record of any of the following codes in any of the fourteen diagnosis code fields in records of any of that patient’s HES episodes.

| Code | Description |
| --- | --- |
| D821 | Di George's syndrome |
|  | Congenital malformations of the nervous system (Q00-Q07) |
| Q00 | Anencephaly and similar malformations |
| Q01 | Encephalocele |
| Q02 | Microcephaly |
| Q03 | Congenital hydrocephalus |
| Q04 | Other congenital malformations of brain |
| Q05 | Spina bifida |
| Q06 | Other congenital malformations of spinal cord |
| Q07 | Other congenital malformations of nervous system |
|  |  |
| Q16 | Congenital malformations of ear causing impairment of hearing |
| Q18 | Other congenital malformations of face and neck |
|  |  |
|  | Congenital malformations of the circulatory system (Q20-Q28) |
| Q20 | Congenital malformations of cardiac chambers and connections |
| Q21 | Congenital malformations of cardiac septa |
| Q22 | Congenital malformations of pulmonary and tricuspid valves |
| Q23 | Congenital malformations of aortic and mitral valves |
| Q24 | Other congenital malformations of heart |
| Q25 | Congenital malformations of great arteries |
| Q26 | Congenital malformations of great veins |
| Q27 | Other congenital malformations of peripheral vascular system |
| Q28 | Other congenital malformations of circulatory system |
|  |  |
| Q380 | Congenital malformations of lips, not elsewhere classified |
| Q75 | Other congenital malformations of skull and face bones |
| Q86 | Congenital malformation syndromes due to known exogenous causes, not elsewhere classified |
| Q87 | Other specified congenital malformation syndromes affecting multiple systems |
|  |  |
|  | Chromosomal abnormalities, not elsewhere classified (Q90-99) |
| Q90 | Down's syndrome |
| Q91 | Edwards' syndrome and Patau's syndrome |
| Q92 | Other trisomies and partial trisomies of the autosomes, not elsewhere classified |
| Q93 | Monosomies and deletions from the autosomes, not elsewhere classified |
| Q95 | Balanced rearrangements and structural markers, not elsewhere classified |
| Q96 | Turner's syndrome |
| Q97 | Other sex chromosome abnormalities, female phenotype, not elsewhere classified |
| Q98 | Other sex chromosome abnormalities, male phenotype, not elsewhere classified |
| Q99 | Other chromosome abnormalities, not elsewhere classified |
